# Supplementary material for: Collaborative practice trends in US physician office visits: an analysis of the National Ambulatory Medical Care Survey (NAMCS), 2007–2016
Source: PubMed Central journal article supplement — BMJ Open. 2020 Jun 21;10(6):e035414. doi: 10.1136/bmjopen-2019-035414 (PMC7311045; doi:10.1136/bmjopen-2019-035414), 2020-06-21
Supplement: bmjopen-2019-035414supp002.pdf [file bmjopen-2019-035414supp002.pdf]

**Supplemental Table 1: Physician office visits by provider type, controlling for two 5-year time-span, NAMCS**

| Provider type               | Overall <sup>a</sup> |                    | 2007–2011 <sup>b</sup> |                    | 2012–2016 <sup>c</sup> |                     | P     |
|-----------------------------|----------------------|--------------------|------------------------|--------------------|------------------------|---------------------|-------|
|                             | n*1000               | %<br>95% CI        | n*1000                 | %<br>95% CI        | n*1000                 | %<br>95% CI         |       |
| <b>Solo Physician</b>       | 7,913,241            | 93.1<br>92.1, 94.1 | 4,091,169              | 51.7<br>49.3, 54.1 | 3,822,071              | 48.3<br>45.9, 50.7  | .17   |
| <b>Solo-PA</b>              | 54,498               | 0.6<br>0.5, 0.8    | 36,577                 | 67.1<br>61.9, 72.3 | 17,920                 | 32.9<br>27.7, 38.1  | <.01* |
| <b>Solo-NP</b>              | 40,844               | 0.5<br>0.3, 0.6    | 26,078                 | 63.8<br>56.2, 71.5 | 14,765                 | 36.2<br>28.5, 43.8  | <.01* |
| <b>Physician-PA</b>         | 366,711              | 4.3<br>3.3, 5.3    | 168,013                | 45.8<br>34.7, 56.9 | 198,698                | 54.2<br>43.1, 65.3  | .46   |
| <b>Physician-NP</b>         | 123,425              | 1.5<br>1.1, 1.8    | 41,308                 | 33.5<br>25.3, 41.7 | 82,117                 | 66.5<br>58.3, 74.7  | <.01* |
| <b>Other Collaborations</b> | 2,770                | 0.03<br>0.01, 0.05 | 1,017                  | 36.7<br>0.0, 84.7  | 1,753                  | 63.3<br>15.3, 100.0 | .46   |
| <b>Total</b>                | 8,501,491            | 100                | 4,364,165              | -                  | 4,137,326              | -                   |       |

CI: Confidence Interval

<sup>a</sup> Overall 10-year of 2007–2016; <sup>b</sup> Time 1: 5-year time-span of 2007–2011; <sup>c</sup> Time 2: 5-year time-span of 2012–2016

\* Significant at alpha=.05
