# Supplementary figures and images for: Collaborative practice trends in US physician office visits: an analysis of the National Ambulatory Medical Care Survey (NAMCS), 2007–2016
Source: PubMed Central journal article supplement — BMJ Open. 2020 Jun 21;10(6):e035414. doi: 10.1136/bmjopen-2019-035414 (PMC7311045; doi:10.1136/bmjopen-2019-035414), 2020-06-21

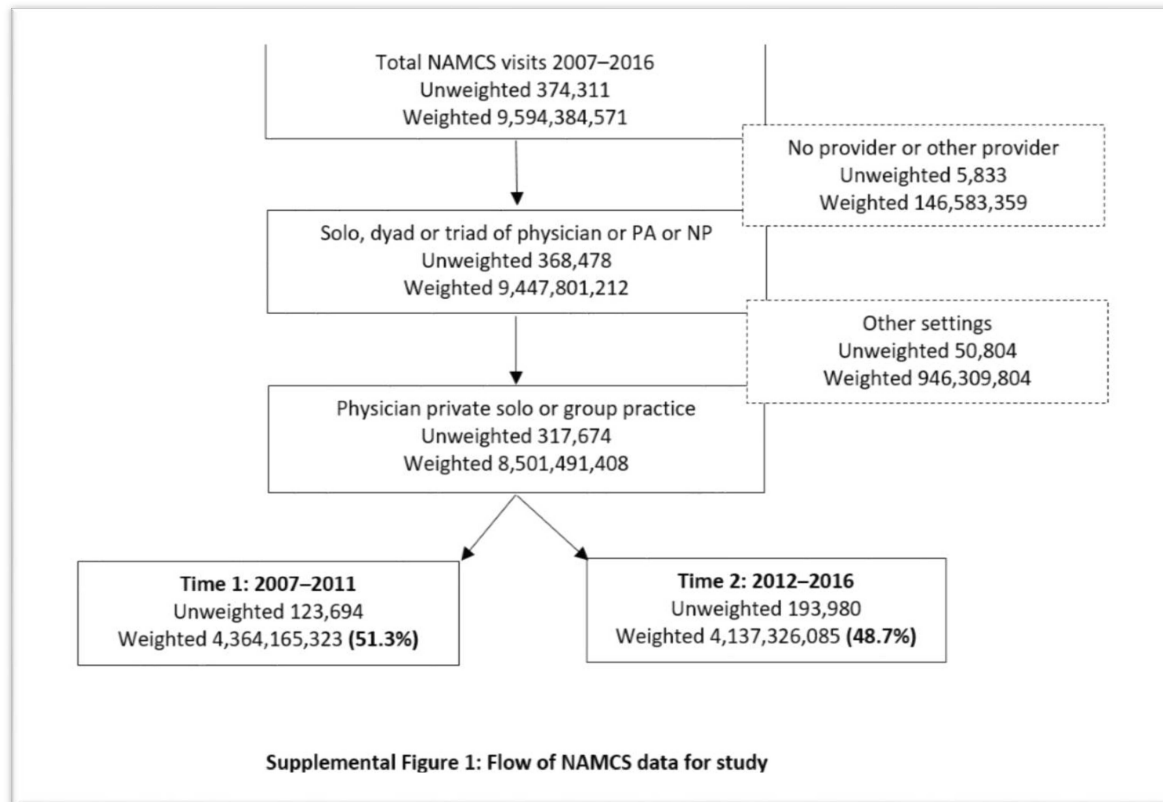

Supplement: bmjopen-2019-035414supp001.pdf [file bmjopen-2019-035414supp001.pdf]
